# Supplementary material
Source: HighWire-hosted journal article supplement (http://www.qdcxjkg.com/highwire/filestream/113630/field_highwire_adjunct_files/0/Supplementary_data.pdf)
Supplement: Supplementary_data.pdf [file Supplementary_data.pdf]

## Online Supplement

### E1. Glossary of terms

|                                   |                                                                                                                                                                                                                                                                                                                                                                                                                                                                                                                                                                                                                                                                                                                                                                                                                                                                                                          |
|-----------------------------------|----------------------------------------------------------------------------------------------------------------------------------------------------------------------------------------------------------------------------------------------------------------------------------------------------------------------------------------------------------------------------------------------------------------------------------------------------------------------------------------------------------------------------------------------------------------------------------------------------------------------------------------------------------------------------------------------------------------------------------------------------------------------------------------------------------------------------------------------------------------------------------------------------------|
| <b>BTPS</b>                       | <p>Body temperature, pressure and saturated. The condition under which lung volumes, respired volumes and flows are reported. Ideally BTPS correction should be dynamic, reflecting the fluctuations of temperature and humidity through the breathing cycle, and variations with flow. Changes in hardware may alter the BTPS correction required, prompting reassessment.</p> <p>The equation to convert ATPS to BTPS is:</p> $V_{\text{BTPS}} = V_{\text{ATPS}} [310^\circ / (273^\circ + T_A)] [(P_1 - P_{\text{H}_2\text{O}}) / (P_1 - 47)]$ <p><math>P_1</math>, ambient barometric pressure (mmHg). <math>T_A</math>, ambient temperature (in centigrade, °C). <math>P_{\text{H}_2\text{O}}</math>, ambient partial pressure of water. Body Temperature is assumed to be 37°C, hence standard temperature is 310°K (i.e. 273°K + 37°C) with a <math>P_{\text{H}_2\text{O}}</math> of 47 mmHg.</p> |
| <b>C</b>                          | Concentration of gas.                                                                                                                                                                                                                                                                                                                                                                                                                                                                                                                                                                                                                                                                                                                                                                                                                                                                                    |
| <b>CDI</b>                        | Convection-Dependent inhomogeneity.                                                                                                                                                                                                                                                                                                                                                                                                                                                                                                                                                                                                                                                                                                                                                                                                                                                                      |
| <b>C<sub>et</sub></b>             | End-tidal gas concentration. A representative measure of alveolar concentration of a particular gas at the end of expiration. Ideally, free of phase IV contribution,                                                                                                                                                                                                                                                                                                                                                                                                                                                                                                                                                                                                                                                                                                                                    |
| <b>CEV</b>                        | Cumulative expired volume, defined as the sum of the expiratory tidal volumes measured up to the point of interest.                                                                                                                                                                                                                                                                                                                                                                                                                                                                                                                                                                                                                                                                                                                                                                                      |
| <b>CEV<sub>alv</sub></b>          | This is the cumulative alveolar expired volume, and represents the cumulative expired volume directly participating in gas exchange. CEV <sub>alv</sub> contribution for each breath is calculated by subtracting airway and external dead space from the expired volume of the breath.                                                                                                                                                                                                                                                                                                                                                                                                                                                                                                                                                                                                                  |
| <b>Closing capacity (CC)</b>      | The volume of gas remaining in the lungs when phase IV starts. Closing capacity = closing volume + residual volume.                                                                                                                                                                                                                                                                                                                                                                                                                                                                                                                                                                                                                                                                                                                                                                                      |
| <b>Closing volume (CV)</b>        | The volume expired from the start of the phase IV to the end of the expiration.                                                                                                                                                                                                                                                                                                                                                                                                                                                                                                                                                                                                                                                                                                                                                                                                                          |
| <b>Convection</b>                 | Net volume change driven by differences in pressure. “Bulk flow”.                                                                                                                                                                                                                                                                                                                                                                                                                                                                                                                                                                                                                                                                                                                                                                                                                                        |
| <b>DCDI</b>                       | Diffusion-Convection-interaction-Dependent inhomogeneity.                                                                                                                                                                                                                                                                                                                                                                                                                                                                                                                                                                                                                                                                                                                                                                                                                                                |
| <b>Diffusion</b>                  | Gas molecule movement driven by concentration gradients.                                                                                                                                                                                                                                                                                                                                                                                                                                                                                                                                                                                                                                                                                                                                                                                                                                                 |
| <b>Diffusion convection front</b> | Quasi-stationary gas front arising in the zone where convective and diffusive gas mixing mechanisms are of similar importance for gas molecule movement, separating alveolar and bronchial gas concentrations.                                                                                                                                                                                                                                                                                                                                                                                                                                                                                                                                                                                                                                                                                           |
| <b>EELV</b>                       | End expiratory lung volume                                                                                                                                                                                                                                                                                                                                                                                                                                                                                                                                                                                                                                                                                                                                                                                                                                                                               |
| <b>Expirogram</b>                 | Plot of gas concentration vs. expiratory volume for given breath.                                                                                                                                                                                                                                                                                                                                                                                                                                                                                                                                                                                                                                                                                                                                                                                                                                        |
| <b>FRC</b>                        | Functional residual capacity, a representative measure of end expiratory lung volume after a relaxed expiration.                                                                                                                                                                                                                                                                                                                                                                                                                                                                                                                                                                                                                                                                                                                                                                                         |

|                                     |                                                                                                                                                                                                                                                                                                                                                          |
|-------------------------------------|----------------------------------------------------------------------------------------------------------------------------------------------------------------------------------------------------------------------------------------------------------------------------------------------------------------------------------------------------------|
| <b>FRC<sub>gas</sub></b>            | FRC measured as the lung volume communicating with the atmosphere.                                                                                                                                                                                                                                                                                       |
| <b>FRC<sub>Pleth</sub></b>          | FRC measured as the intra-thoracic gas volume using whole body plethysmography, representing all compressible intra-thoracic gas.                                                                                                                                                                                                                        |
| <b>gs</b>                           | Gas sampling point                                                                                                                                                                                                                                                                                                                                       |
| <b>IGW</b>                          | Inert gas washout.                                                                                                                                                                                                                                                                                                                                       |
| <b>Inert marker gas</b>             | A non toxic gas that does not participate in gas exchange or other metabolic processes that has a relatively low solubility in blood and other tissue and that can be measured rapidly online.                                                                                                                                                           |
| <b>LCI</b>                          | Lung Clearance Index.                                                                                                                                                                                                                                                                                                                                    |
| <b>Mainstream</b>                   | The main path of the respiratory flow.                                                                                                                                                                                                                                                                                                                   |
| <b>MBW</b>                          | Multiple breath inert gas washout test. An open circuit inert gas washout test involving either spontaneous or controlled tidal breathing, allowing determination of FRC and various indices of ventilation distribution non uniformity.                                                                                                                 |
| <b>Open circuit washout system</b>  | System with minimal re-inspiration of exhaled gas.                                                                                                                                                                                                                                                                                                       |
| <b>Peclet number</b>                | Describes the ratio of convective (the product of gas velocity and airway diameter) and diffusive gas transport in the airway. The diffusion-convection front arises between a Pe number of 1 and 0.1.<br><br>Peclet number = $ud/D$<br>Where, $u$ is gas velocity, $d$ is airway diameter and $D$ is gas diffusivity.                                   |
| <b>Phase I</b>                      | Phase of expiration when no alveolar gas has yet appeared (i.e. no increase of inert gas concentration after previous inspiration), also referred to as absolute dead space volume.                                                                                                                                                                      |
| <b>Phase II</b>                     | Portion of expirogram with a rapid increase of inert marker gas concentration representing the average of the sequential arrivals of diffusion fronts from the lung periphery. Termed the bronchial phase of the expirogram.                                                                                                                             |
| <b>Phase III</b>                    | Phase of expirogram representing alveolar gas concentration. Termed the alveolar phase of the expirogram.                                                                                                                                                                                                                                                |
| <b>Phase IV</b>                     | Late phase of expirogram occurring in the presence of airway closures. Onset of phase IV slope is marked by sudden increase in inert gas concentration occurring during the alveolar phase. Measured as intercept of phase III and phase IV slopes.                                                                                                      |
| <b>Relative humidity (RH)</b>       | Percentage of maximum water vapour pressure at a given temperature.                                                                                                                                                                                                                                                                                      |
| <b>Response time (gas analyser)</b> | By definition, the time required for a gas sensor's signal to raise from 10-90% of a step change in gas concentration.                                                                                                                                                                                                                                   |
| <b>Single breath washout (SBW)</b>  | An open circuit inert gas washout test involving a predefined controlled breath size, inspiratory and expiratory flow and pre- and post-inspiratory lung volumes. The SBW test is used to assess non-uniformity of ventilation distribution from the slope of the phase III, the closing volume, the closing capacity and/or the height of the phase IV. |

|                                              |                                                                                                                                                                                                                                                                                                                                                                                                                                                                                                                                                                                                                                                                                                                         |
|----------------------------------------------|-------------------------------------------------------------------------------------------------------------------------------------------------------------------------------------------------------------------------------------------------------------------------------------------------------------------------------------------------------------------------------------------------------------------------------------------------------------------------------------------------------------------------------------------------------------------------------------------------------------------------------------------------------------------------------------------------------------------------|
| <b>Sequencing</b>                            | Sequential filling and emptying among lung units due to differences in mechanical properties, i.e. Resistance ( $R$ ) and/or Compliance ( $C$ ), which determine time constant ( $\tau$ ; $\tau = R * C$ ). Sequencing is a prerequisite for phase III to arise in the conducting airway zone.                                                                                                                                                                                                                                                                                                                                                                                                                          |
| <b>Sidestream</b>                            | Sample taken from the mainstream.                                                                                                                                                                                                                                                                                                                                                                                                                                                                                                                                                                                                                                                                                       |
| <b>Signal-to-Noise ratio</b>                 | Measure of signal strength relative to background noise, and conventionally expressed as the mean/SD of a gas input of constant concentration over a period of 10 seconds.                                                                                                                                                                                                                                                                                                                                                                                                                                                                                                                                              |
| <b>S<sub>III</sub></b>                       | Phase III slope. Mean rate of increase in gas concentration during phase III, measured by linear regression and expressed as percent per litre (%/L).                                                                                                                                                                                                                                                                                                                                                                                                                                                                                                                                                                   |
| <b>Sn<sub>III</sub></b>                      | Phase III slope ( $S_{III}$ ) normalised for the gas dilution occurring over the MBW. This can be performed by dividing $S_{III}$ by one of three different reference inert marker gas concentrations.<br>1. Mean inert marker gas concentration over the entire expiration ( $Sn_{III,mb} = S_{III} / \text{mean } C_{\text{gas}} \text{ over breath}$ ).<br>2. Mean inert marker gas concentration over the interval used for $S_{III}$ calculation. ( $Sn_{III,ms} = S_{III} / \text{mean } C_{\text{gas}} \text{ over slope interval}$ ).<br>3. End tidal gas concentration. ( $Sn_{III,et} = S_{III} / C_{et}$ ).<br>The choice of normalisation concentration must be clearly stated.                             |
| <b>Specific ventilation</b>                  | The change in volume of a lung unit with breathing as a proportion of its initial volume ( $\Delta V / V$ ).                                                                                                                                                                                                                                                                                                                                                                                                                                                                                                                                                                                                            |
| <b>Synchronisation of gas to flow signal</b> | Asynchrony between gas and respiratory flow signals created by transit time of gas within sampling tubing and analyser response characteristics. Transit time is the time from start of exposure to the first deflection of a step change in gas concentration. Response time is measured as the signal change from 10-90% of full signal deflection in response to a step change in gas concentration. Synchronisation time shift is defined as transit time plus from start of deflection to 50% of full deflection.                                                                                                                                                                                                  |
| <b>TO</b>                                    | Lung volume turnover. The cumulative expired volume (CEV, i.e. sum of the expired tidal volumes) expressed as the number of lung volume turnovers after a given breath during an MBW. The method of calculation must be clearly described (see below).<br><br>Where pre-gas sampling point (gs) $V_D$ dead space is defined, TO is referenced to the airway opening ( $TO_{ao}$ )<br>$TO_{ao} = \frac{\text{CEV} - \text{number of breaths} \cdot (V_{D,pre-gs} + V_{D,post-gs})}{FRC_{ao}}$<br><br>Where pre-gs $V_D$ is uncertain (e.g. infants, pre-schoolers), TO is referenced to the gas sampling point ( $TO_{gs}$ )<br>$TO_{gs} = \frac{\text{CEV} - (\text{number of breaths} \cdot V_{D,post-gs})}{FRC_{gs}}$ |

|                                               |                                                                                                                                                                                                                                                                                                                                                                                                                                                                                                                                                                                                                                                                                                                                                                                                                                                                                                                                                                                                                                                                                                                                                                                                                                                                                                                                                                                                                                                                                                                                                                                                                                                                                                                                                                                                                                                                                                                                                                                                                                                                                                                                                                                                                                                                                                                                                                                                                                |
|-----------------------------------------------|--------------------------------------------------------------------------------------------------------------------------------------------------------------------------------------------------------------------------------------------------------------------------------------------------------------------------------------------------------------------------------------------------------------------------------------------------------------------------------------------------------------------------------------------------------------------------------------------------------------------------------------------------------------------------------------------------------------------------------------------------------------------------------------------------------------------------------------------------------------------------------------------------------------------------------------------------------------------------------------------------------------------------------------------------------------------------------------------------------------------------------------------------------------------------------------------------------------------------------------------------------------------------------------------------------------------------------------------------------------------------------------------------------------------------------------------------------------------------------------------------------------------------------------------------------------------------------------------------------------------------------------------------------------------------------------------------------------------------------------------------------------------------------------------------------------------------------------------------------------------------------------------------------------------------------------------------------------------------------------------------------------------------------------------------------------------------------------------------------------------------------------------------------------------------------------------------------------------------------------------------------------------------------------------------------------------------------------------------------------------------------------------------------------------------------|
| $V_D$                                         | <p>Dead space volume. Constitutes the portion of the tidal volume which does not participate in gas exchange, and is composed of the external equipment related dead space (<math>V_{D,ext}</math>) and the volume of the conducting airways (<math>V_{D,aw}</math>).</p> <p>External dead space volume is partitioned into pre- and post-gs <math>V_D</math>.</p> <p><b>1. Pre-gs dead space volume (<math>V_{D,pre-gs}</math>):</b> <math>V_D</math> between the airway opening and the point at which inert gas is sampled.</p> <p><b>2. Post-gs dead space volume (<math>V_{D,post-gs}</math>):</b> <math>V_D</math> between the gas sampling point and the bias flow. This can be calculated as the total amount of marker gas re-inspired, expressed as the corresponding volume of air.</p> <p>Equipment dead space can be estimated by water displacement, but may be considerably larger than actual functional (effective) dead space, measured using the Fowler method from the <math>CO_2</math> expirogram [1, 2] or the MM signal [3]. Physical and physiological factors may also be influential: face shape and mask pressure, and time constants during the washout [4].</p> <p>Pulmonary dead space [5], or non-equipment related airways dead space, can be partitioned into the following components.</p> <p><b>1. Respiratory dead space volume (<math>V_{D,resp}</math>):</b> defined as the volume of airways and respiratory units that do not effectively take part in gas mixing, and as such constitutes a purely <i>respiratory</i> dead space. It consists of <math>V_{D,aw} + V_{D,alv}</math>. <math>V_{D,resp}</math> can be estimated from the expirogram using the Bohr equation (<math>V_{D,Bohr}</math>; [6]). <math>V_{D,resp} = V_{D,Bohr} = V_{D,aw} + V_{D,alv}</math>.</p> <p><b>2. Airways dead space volume (<math>V_{D,aw}</math>):</b> defined as the volume of the conducting airways, measured either using the Fowler [1] or Langley method [7], subsequently modified by Tang et al [4].</p> <p><b>3. Alveolar dead space volume (<math>V_{D,alv}</math>):</b> <math>V_{D,alv} = V_{D,Bohr} - V_{D,aw}</math>.</p> <p><b>4. Physiological dead space (<math>V_{D,phys}</math>):</b> defined as, arterial <math>CO_2</math> concentration:<br/>i.e. <math>(PaCO_2/P_{ambient}) \cdot V_T</math> - expired volume of <math>CO_2/FCO_2</math> to express as a volume of air.</p> |
| <b>Ventilation distribution inhomogeneity</b> | <p>Non-uniformity of gas distribution within the lung. Can be assessed using either global measures of ventilatory inefficiency (e.g. Lung clearance index, LCI, or moment ratios) or specific indices (e.g. <math>S_{acin}</math> and <math>S_{cond}</math>). The latter provide additional insight into the mechanisms and origin of the abnormality in distribution of ventilation.</p>                                                                                                                                                                                                                                                                                                                                                                                                                                                                                                                                                                                                                                                                                                                                                                                                                                                                                                                                                                                                                                                                                                                                                                                                                                                                                                                                                                                                                                                                                                                                                                                                                                                                                                                                                                                                                                                                                                                                                                                                                                     |
| $V_T$                                         | <p>Tidal Volume (i.e. breath size or volume). Defined as the breath size over a period of breathing. Unless specified <math>V_T</math> refers to expiratory tidal volume.</p>                                                                                                                                                                                                                                                                                                                                                                                                                                                                                                                                                                                                                                                                                                                                                                                                                                                                                                                                                                                                                                                                                                                                                                                                                                                                                                                                                                                                                                                                                                                                                                                                                                                                                                                                                                                                                                                                                                                                                                                                                                                                                                                                                                                                                                                  |
| $V_{TG}$                                      | <p>Volume of Trapped Gas, conventionally measured as <math>FRC_{Pleth} - FRC_{gas}</math>. Alternatively this can be measured as the amount of inert marker gas, expressed as the corresponding volume of air,</p>                                                                                                                                                                                                                                                                                                                                                                                                                                                                                                                                                                                                                                                                                                                                                                                                                                                                                                                                                                                                                                                                                                                                                                                                                                                                                                                                                                                                                                                                                                                                                                                                                                                                                                                                                                                                                                                                                                                                                                                                                                                                                                                                                                                                             |

|  |                                                                                                                                                  |
|--|--------------------------------------------------------------------------------------------------------------------------------------------------|
|  | mobilised by 3-5 inspiratory capacity (IC) breaths performed at the end of the MBW test, in excess of the FRC as measured at the end of the MBW. |
|--|--------------------------------------------------------------------------------------------------------------------------------------------------|

## **E2. Specific recommendations for components in inert gas washout systems**

Section E2.6 outlines specific recommendations for individual components within a washout system. The combination of features not only determines overall accuracy but also suitability of systems for use in different age groups. Features of current systems and their suitability for different age ranges are discussed in section E2.7.

### **E2.1 Flow and volume measurement**

A linear flow meter calibrated across the range of flows encountered during testing should be used, as described by Yeh *et al* [8-10]. High data sampling rates ensure accurate reconstruction of the flow signal and provide the resolution required for detecting changes in the breathing pattern [9]. A sampling rate of at least 100Hz has been recommended for measures of infant lung function [9, 11], where faster breathing rates encountered, and is adopted in these guidelines. Magnitude of aliasing error introduced with lower sampling rates is unclear for washout, but may decrease in older age groups with slower respiratory rates.

Variations in dynamic gas viscosity related to gas composition must be accounted for when using pneumotachographs [12, 13], which should be heated to above airway temperature to prevent condensation-induced errors in flow measurement. Washout system designs using a bag-in-box design avoid the need for this correction, but are too bulky for widespread clinical use [14, 15]. Alternative flow meters include

ultrasonic flow meters, mass flow sensors and turbines. Flows and integrated volumes should be reported at BTPS (body temperature, pressure, saturated with water).

Volume drift during testing may occur due to physiological or methodological reasons (e.g. erroneous BTPS settings) or technical errors [8], which may be difficult to differentiate. Drift correction algorithms should be clearly described, as the effect of drift correction on washout results remains poorly defined.

When sidestream analysers sample from the middle of the airstream, proximal to the flow measurement point, gas drawn off by the analyser (sample flow) represents “lost gas” introducing marker gas and flow measurement error and affects accurate estimation of volumes. Error becomes additive in subsequent integrated volumes.

Subjects with low tidal flows, e.g. infant and young children, are particularly susceptible to such errors. Sample flow should be corrected for and ideally minimised whilst meeting the requirements of a gas analyser for a fast effective rise time [16]. In sidestream systems sample flow has a direct effect on, and inverse relationship to, analyser response, both in terms of transit time of the gas bolus and the analyser rise time. Fixed correction factors used for high pressure systems with constant flow (e.g. respiratory mass spectrometer, RMS) may not be appropriate for high flow systems under lower pressure, where sample flow may vary with generated inspiratory and expiratory flow. Depending on its magnitude, loss of inspiratory flow, expiratory flow and volume of inert marker gas need to be accounted for. Magnitude of error introduced by sidestream sampling distal to the flow measurement point is likely to be lower but must still be assessed in any washout system based on this approach.

## **E2.2 Inert gas concentration measurement**

Gas analysers using several different physical measurement principles are available. These generally measure partial pressure of gas, subsequently presented as a percentage of all gases contributing to atmospheric pressure, with or without the inclusion of water vapour pressure, and relative to a set span of values determined using dry calibration gases. During *in vivo* recordings, gas concentrations are measured during varying conditions (e.g. dry conditions during inspiration and approaching BTPS conditions during expiration). Changes in gas volume with temperature and humidity fluctuation affect all constituent gases equally but not their relative proportions. Ideally, analysers should measure and report gas concentrations under constant conditions throughout the washout (i.e. independent of variations in temperature and humidity), and preferentially report values under dry conditions for simplicity.

Using nafion tubing with sidestream gas analysers allows dry gas concentrations to be calculated, when taking ambient conditions into account [17]. Gas passing along nafion tubing (e.g. Perm-pure “drying” system, DuPont Corporation®) equilibrates to ambient conditions (water vapour pressure and temperature) but its use is not feasible with N<sub>2</sub> analysers (emission spectrophotometers) as these analysers operate under vacuum conditions. Constant dry conditions can be achieved with a RMS, when all constituent gases (excluding water vapour) are summed to 100% in each recording cycle. It is, however, generally not possible for analysers monitoring only one gas to report gas concentration under constant conditions. Detrimental effects of humidity and temperature occur, for example, in mainstream MM signals [18] and N<sub>2</sub> analysers (emission spectrophotometers) [19], which may cause significant non-linearity and

measurement errors unless accounted for. Subsequent correction is problematic due to difficulties measuring rapidly changing humidity and temperature profiles during respiratory cycles [20]. Accuracy of BTPS correction of flow presents a similar challenge.

Analyser signal-to-noise ratio (measured as the mean/SD of data measured over a time period such as 10 seconds) and signal resolution should be high enough to enable determination of stable end tidal inert gas concentrations within 1% relative to the inert gas concentration at the start (e.g. for 78% N<sub>2</sub> this is  $\pm 0.8\%$ ) and 5% relative to the inert gas concentration at the end of an MBW, typically 1/40<sup>th</sup> of the starting concentration (e.g. for 2% N<sub>2</sub> this is  $\pm 0.1\%$ ). Linearity must be documented over the full measurement range encountered during clinical testing, and should include assessment of the impact of BTPS conditions. Analysers may be inherently nonlinear, and whilst detailed non-linearity correction algorithms have been published, these are analyser specific [21]. Two point calibrations are recommended prior to each testing session. Linearity should be monitored using sufficient calibration gas points, determined by the shape of the calibration curve as directed by the manufacturer and based on the inherent properties of the analyser and its documented performance over time.

Long rise time, in relation to the frequency content of the physiological signal, related to respiratory rate, may lead to errors in determination of inspired and expired gas volumes [16, 22]. A sharp fall in inspiratory gas concentration occurs in early inspiration and inspiratory gas volumes are particularly susceptible to measurement error. Error is proportional to the size of re-inspired post-gs  $V_D$ . For a given minute



ventilation, relative magnitude of FRC error increases with smaller  $V_T$  and higher respiratory rates [4, 23]. A response time of less than 100ms is recommended and is felt to be appropriate for all age groups. This can be determined easily by the fast step reaction during inspiration, occurring during re-inspiration of post gs  $V_D$  (Section E5.2). Gas signal speeding algorithms have been developed [24] and validated for RMS [25] that may be beneficial for other analysers, particularly if multiple analysers with differing intrinsic rise times are used in a single washout system (e.g.  $O_2$  and  $CO_2$  analysers for indirect  $N_2$  calculation, section E3.2).

### **E2.3 Synchronisation of flow and gas signals**

Gas signals must be synchronised precisely with flow prior to data presentation and analysis, and should occur after any applied volume or gas analyser drift correction (if performed). Respiratory flow is assumed to be the same throughout the recording system at a given point in time, while the profile of gas concentration is generally different. In cases where gas concentration is assessed at a different location to the actual gas sampling point (e.g. attempts to measure dead space volume at lips), synchronisation may become respiratory flow dependent (with greater separation occurring at lower flows), and may differ between inspiration and expiration depending on equipment layout [3]. This may also occur if two or more gases are sampled at different points in the recording system. Washout systems should be assessed for this phenomenon and ideally designed to avoid the need for this complicated type of correction.

The time shift required for synchronisation should be assessed using a step response for each gas of interest with a simultaneous measurement of flow. Various methods

exist to synchronisation data, each with advantages and disadvantages (section E5.1). The optimal method and thresholds for synchronisation accuracy are unclear, but both published [26] and unpublished data (personal communication C. Buess, nnd Medical Technologies Switzerland) suggests within 10ms. Viscosity-dependent synchronisation is necessary for N<sub>2</sub> MBW performed using RMS and 100% O<sub>2</sub> for washout [27, 28], due to variations in dynamic viscosity of gas samples (O<sub>2</sub> is markedly more viscous than air) on transit times along the narrow RMS capillary tubing. This may lead to errors of up to 17% in FRC and 70% in V<sub>D</sub> measurement [27]. Proposed dynamic algorithms for synchronisation have not yet been applied to physiological data. For this reason N<sub>2</sub> MBW using RMS, whilst possible, should not be undertaken without due consideration of these issues. When using an USFM, both MM and flow signals can be measured simultaneously in the mainstream without any signal delay.

#### **E2.4 Minimisation of equipment deadspace volume (V<sub>D</sub>)**

Equipment-related V<sub>D</sub> may exert detrimental effects for both the subject and subsequent analysis and should be minimized to less than 2 mL/kg [9, 29], or 70 mL for adults, and accounted for. Increased V<sub>D</sub>/V<sub>T</sub> may increase respiratory rate and/or V<sub>T</sub> [30, 31], and alter ventilation distribution inhomogeneity, and is particularly critical for infants. In infants equipment V<sub>D</sub> < 1 mL/kg is ideal [9]. CEV is assumed to increase by the same amount per breath as that externally added to the equipment V<sub>D</sub>, and is accounted for accordingly. Pre-gs V<sub>D</sub> may be minimised using silicone putty within facemasks in infants and preschoolers, taking care not to obstruct the airway opening. Nasal masks have been used in neonates and are feasible due to the preferential nasal breathing during this period [32], but whilst FRC measurements

may be very similar to those collected using facemasks, measures of ventilation distribution inhomogeneity may differ. Disposable inserts may avoid the need for bacterial filters, which may introduce prohibitively large additional  $V_D$  in younger subjects [33]. Post-gs  $V_D$  should be minimised to, firstly, avoid rebreathing impact of large post-gs  $V_D$ , and, secondly, to minimize effects of any error in measured re-inspired inert gas volumes on subsequent indices. Measures to reduce  $V_D$  should not increase equipment resistance [9], which may alter breathing pattern, FRC, as well as respiratory mechanics, reflected by altered pressure-volume curves.

### **E2.5 Delivery of washin and washout gas**

Gas can be delivered using a variety of options: using a bias flow (by-pass or flow-past) system; using a passive two-way valve system and delivery of gas from a pre-filled bag; or using a demand valve and gas delivered from a pressurised gas cylinder. Two-way valves and demand valves increase resistance to flow and may alter breathing pattern, but conserve gas. Bias flow systems have minimal effect on breathing pattern, minimise post-gs  $V_D$  and resistance, but at the cost of greater gas use. Bias flow must be flushed during expiration before commencing the washout phase, and chosen bias flow should eliminate re-inspiration of expired gas beyond post-gs  $V_D$ , by ensuring bias flow exceeds the subject's peak inspiratory flow. A period of initial inspiratory flow monitoring to determine optimal bias flow may help conserve gas.

## E2.6 Recommendations for inert gas washout system characteristics

| <b>Component</b>                   | <b>Recommendation</b>                                                                                                                                                                                                                                                                                                                                      | <b>Comments</b>                                                                                                                                                                                                                                                                                                                                                                                                              |
|------------------------------------|------------------------------------------------------------------------------------------------------------------------------------------------------------------------------------------------------------------------------------------------------------------------------------------------------------------------------------------------------------|------------------------------------------------------------------------------------------------------------------------------------------------------------------------------------------------------------------------------------------------------------------------------------------------------------------------------------------------------------------------------------------------------------------------------|
| <i>Flow and Volume measurement</i> |                                                                                                                                                                                                                                                                                                                                                            |                                                                                                                                                                                                                                                                                                                                                                                                                              |
| <b>Flow measurement</b>            | Instantaneous flow accuracy within 5% across the range of flows encountered during clinical testing and volume accuracy within 3% using a precision calibration syringe.                                                                                                                                                                                   | Based on previous infant lung function guidelines [8, 9, 11]. Accuracy at low flows is increasingly important as age decreases.<br>Methodology to achieve linearity of pneumotachometers has been reported [10].                                                                                                                                                                                                             |
| <b>Sample flow</b>                 | Ideally, all sidestream washout systems should correct for sample flow.<br><br>If correction is not performed or achievable, sample flow should be minimised: proposed acceptable thresholds are <20mL/min for paediatric apparatus and <40mL/min for adult apparatus where gas sample point is proximal to flow meter.                                    | Currently, thresholds for acceptable sample flow are not evidence based. Excessive sample flow may also have detrimental effect on breath detection.<br><br>Thresholds depend on site of sampling i.e. proximal or distal to flow measurement point. The effects of distal sampling on flow measurement should still be assessed in any IGW system.<br><br>Dynamic sample flow corrections may be required for some systems. |
| <b>Volume drift</b>                | Accurate correction of volume drift is problematic due to difficulty separating technical and physiological components to observed drift.<br><br>When an excessive volume drift appears, beyond the range usually observed, attempts to identify physiological and/or technical causes (e.g. leaks) should be made as part of the routine quality control. | Recommendations from previous published infant lung function guidelines have suggested that volume drift of <1mL/s should be corrected automatically [9]. This may not be readily extrapolated to washout systems, as the magnitude of error introduced into subsequent washout outcomes of volume drift is unclear.<br><br>If volume drift correction is performed it should be clearly stated and described.               |
| <i>Inert Gas Analyser</i>          |                                                                                                                                                                                                                                                                                                                                                            |                                                                                                                                                                                                                                                                                                                                                                                                                              |
| <b>Gas analyser accuracy</b>       | Demonstrated linearity within 1% relative of full                                                                                                                                                                                                                                                                                                          | Based on consensus view, not evidence based criteria.                                                                                                                                                                                                                                                                                                                                                                        |

|                                     |                                                                                                                                                                                                                                                                                                                                                                                                                                                                                                                                    |                                                                                                                                                                                                                                                                                                                                                                                                                                                                                                                                                                    |
|-------------------------------------|------------------------------------------------------------------------------------------------------------------------------------------------------------------------------------------------------------------------------------------------------------------------------------------------------------------------------------------------------------------------------------------------------------------------------------------------------------------------------------------------------------------------------------|--------------------------------------------------------------------------------------------------------------------------------------------------------------------------------------------------------------------------------------------------------------------------------------------------------------------------------------------------------------------------------------------------------------------------------------------------------------------------------------------------------------------------------------------------------------------|
|                                     | <p>scale (e.g. 0-80% is +/- 0.8% at 80% N<sub>2</sub>) to ensure appropriate assessment of starting concentration, <u>and</u> within 5% relative of any lower value (e.g. 0.25% at 5% N<sub>2</sub>) down to 1/40<sup>th</sup> of the starting concentration.</p> <p>Initial assessment should be in both dry and humid conditions.</p> <p>Monitor gas analyser linearity annually using at least three reference points of gas concentration.</p> <p>Analyser signal-to-noise ratio should be high enough to facilitate this.</p> | <p>The impact of non-linearity on measurement accuracy is well established. The upper end accuracy criterion corresponds to a signal-to-noise ratio of &gt;100.</p> <p>Frequency of monitoring based on consensus view but is also influenced by the stability of the gas analyser and ideally should be determined by the manufacturer.</p> <p>Non-linearity correction algorithms may require more detailed ongoing assessment depending on the pattern of non-linearity. Algorithms should be clearly described [21], and appropriate for humid conditions.</p> |
| <b>Gas analyser rise time</b>       | <p>Analyser rise time should be short enough to adequately characterise the respiratory cycle (frequency content of physiological signals) of the smallest subject being tested.</p> <p>A rise time of &lt;100 ms is recommended across all age groups. In principle, the shorter the rise time, the better. This recommendation does not apply to and would be insufficient for measurement during high frequency ventilation.</p>                                                                                                | <p>Based on consensus view, not evidence based criteria.</p> <p>Whilst the response required for accurate estimation of alveolar concentration are likely to be age dependent, correction for re-inspired gas (and any index based on steep transition phases of the expirogram) require fast responding analysers in all age groups.</p>                                                                                                                                                                                                                          |
| <b><i>Other characteristics</i></b> |                                                                                                                                                                                                                                                                                                                                                                                                                                                                                                                                    |                                                                                                                                                                                                                                                                                                                                                                                                                                                                                                                                                                    |
| <b>Data sampling frequency</b>      | <p>Data sampling should ideally be <math>\geq 100</math> Hz for both flow and inert gas concentration measurement and at greater than twice the fundamental frequency of the faster physiological signal of flow and gas concentration (Shannon sampling theorem) [9].</p>                                                                                                                                                                                                                                                         | <p>Based on consensus view, not evidence based criteria.</p> <p>Error introduced by slower sampling rates is likely to be age dependent, and decrease as respiratory rates fall.</p> <p>Sampling frequency should ideally be identical for both flow</p>                                                                                                                                                                                                                                                                                                           |

|                                                                    |                                                                                                                                                                                                                                                                                                                        |                                                                                                                                                                                                                                                                                                                                                                                 |
|--------------------------------------------------------------------|------------------------------------------------------------------------------------------------------------------------------------------------------------------------------------------------------------------------------------------------------------------------------------------------------------------------|---------------------------------------------------------------------------------------------------------------------------------------------------------------------------------------------------------------------------------------------------------------------------------------------------------------------------------------------------------------------------------|
|                                                                    |                                                                                                                                                                                                                                                                                                                        | and inert gas concentration.                                                                                                                                                                                                                                                                                                                                                    |
| <b>Synchronisation of flow and inert gas concentration signals</b> | <p>Alignment accuracy within 10 ms or one sample (whichever is greater).</p> <p>Should ideally be measured at the start of each testing session, and accuracy of alignment should be possible to review, re-measure and adjust off-line as necessary.</p>                                                              | <p>Optimal method for acceptable synchronisation accuracy are currently unclear.</p> <p>Thresholds for synchronisation accuracy are based on both published and unpublished data. Thresholds are dependent on the breathing pattern: error is directly proportional to respiratory rate.</p>                                                                                    |
| <b>Equipment related dead space</b>                                | <p>Total equipment dead space for young children should be &lt;2 mL/kg [9, 29], and ideally &lt;1 mL/kg in infants.</p> <p>Recommendations should be adhered to in older subjects, until further evidence is available. An upper limit of 70 mL should be adhered to for adults including hygiene filters if used.</p> | <p>Based on consensus view, not evidence based criteria.</p> <p>Exact thresholds may differ across age and disease groups. Infants and preschoolers are most susceptible. Large deadspace affects gas mixing indices, breathing pattern, comfort and feasibility.</p> <p>Methods of dead space volume measurement should be clearly described (e.g. by water displacement).</p> |
| <b>Equipment related resistance</b>                                | <p>Should be minimised for both inspiration and expiration to avoid effects on breathing pattern and FRC during test.</p>                                                                                                                                                                                              | <p>Significant increases in resistance increase expiratory time constant and potentially influence end-expiratory level (i.e. FRC).</p>                                                                                                                                                                                                                                         |

### **E2.7 Characteristics of some published inert gas washout systems**

The table below describes the characteristics of recognised published washout systems currently used. This is not intended to be an exhaustive list, but is shown to illustrate how differing characteristics affect suitability for different age ranges. It also illustrates that none of these systems fulfil *all* of the criteria outlined in section E2. However, overall acceptable system FRC validation, against the currently recommended lung model (Figure 4 main manuscript) has still been achievable despite this for a number of these systems to date [34, 35].

|                                                   | RMS based [36]                     | N <sub>2</sub> analyser based [37, 38] | Photoacoustic analyser based [26]     | Indirect inert gas concentration based [34, 35] |                                                                                           |
|---------------------------------------------------|------------------------------------|----------------------------------------|---------------------------------------|-------------------------------------------------|-------------------------------------------------------------------------------------------|
| Custom or Commercial                              | Custom                             | Custom                                 | Custom (modified Innocor, Innovision) | Commercial (EasyOne Pro LAB™, ndd) MM based     | Commercial (Exhalyser D, ECO Medics AG) O <sub>2</sub> and CO <sub>2</sub> analyser based |
| <b>Flow and Volume measurement</b>                |                                    |                                        |                                       |                                                 |                                                                                           |
| Flow meter                                        | Pneumotachograph                   |                                        |                                       | Ultrasonic flow sensor                          |                                                                                           |
| Sample flow (mL/min)                              | 20                                 | 5                                      | 120 <sup>#</sup>                      | 480 <sup>#</sup>                                | 200 for O <sub>2</sub><br>Mainstream CO <sub>2</sub>                                      |
| <b>Inert Gas analyser characteristics</b>         |                                    |                                        |                                       |                                                 |                                                                                           |
| Orientation of gas analyser                       | Sidestream gas analysis            |                                        |                                       |                                                 | Sidestream O <sub>2</sub><br>Mainstream CO <sub>2</sub>                                   |
| Inert gas                                         | SF <sub>6</sub>                    | N <sub>2</sub>                         | SF <sub>6</sub>                       | N <sub>2</sub>                                  | N <sub>2</sub>                                                                            |
| Response time (ms)                                | 64                                 | 20                                     | 154                                   | 80                                              | 110 for O <sub>2</sub><br>55 for CO <sub>2</sub>                                          |
| Washin gas                                        | 4% SF <sub>6</sub> , 4% He         | Room air                               | 0.2 % SF <sub>6</sub>                 | Room air                                        | Medical air                                                                               |
| Washout gas                                       | Room air                           | 100% O <sub>2</sub>                    | Room air                              | 100% O <sub>2</sub>                             | 100% O <sub>2</sub>                                                                       |
| Sample rate (Hz)                                  | 33 <sup>†</sup>                    | 50                                     | 100                                   | 400                                             | 200                                                                                       |
| Sn <sub>III</sub> analysis currently possible     | Yes                                | Yes                                    | Yes                                   | No                                              | Yes                                                                                       |
| <b>Equipment-related dead space volume (mL)**</b> |                                    |                                        |                                       |                                                 |                                                                                           |
| Post gs V <sub>D</sub>                            | Infant 5<br>Preschool 15           | 50                                     | 5                                     | 15                                              | Preschool and above 16<br>Adult 27                                                        |
| Pre gs V <sub>D</sub>                             | Facemask 7.5-12.5<br>Mouthpiece <5 | Mouthpiece 5                           | Paediatric 36 mL<br>Adult 46mL        | 20                                              | 30                                                                                        |
| Bacterial filter present and included             | No                                 | No                                     | Yes                                   | No***                                           | Yes                                                                                       |
| <b>Suitability for different age ranges</b>       |                                    |                                        |                                       |                                                 |                                                                                           |
| Infants                                           | Yes                                | No                                     | No                                    | No                                              | No                                                                                        |
| Preschoolers                                      |                                    | No                                     |                                       | Yes                                             | Yes                                                                                       |
| School aged children                              |                                    | Yes                                    |                                       |                                                 |                                                                                           |
| Adults                                            |                                    |                                        |                                       |                                                 |                                                                                           |

\*using indirect measurement method (see section E3.1). \*\*by water displacement, \*\*\*disposable inert used for both dead space volume reduction and infection control. RMS, respiratory mass spectrometer. MM, molar mass. †measures all constituent gases in one cycle. #positioned distal to the flow measurement point.



### **E3. Indirect measurement of inert gas concentration**

Indirect measurement of inert gas concentration is feasible but more complex, and contains additional inbuilt assumptions, which are important to appreciate when assessing devices. Simultaneous use of more than one type of gas analyser requires precise synchronisation, given the differing analyser response profiles present, to ensure accurate inert gas concentration estimation. “Speeding” algorithms [25] may improve response times of slower analysers, and response profiles may also differ between inspiration and expiration. The principles of two indirect methods used in commercial devices are outlined below, but may or may not reflect exact methods currently used by manufacturers, which should be clearly described in supporting documentation for indirect washout systems.

#### **E3.1 Molar mass measurement using an ultrasonic flow meter (USFM) based system**

USFM infers inert gas concentration by measuring relative change in MM of sample gas through the breathing cycle. Methodology has been described in detail elsewhere [39], and is briefly summarised here. Simultaneous measurements of flow and gas density are feasible. Flow is determined from difference in transit times for ultrasonic pulses emitted between two transducers across a fixed distance [40], and based on the principle that sound travelling through a streaming medium is accelerated or slowed by movement of the medium. MM can be derived from transit times as it is directly proportional to density of the medium:

$$\varphi = (MM \cdot p) / (R \cdot T)$$

where,  $\varphi$  is gas density, MM is molar mass, p is pressure, R is the gas constant, and T is temperature.

This temperature dependence means that precise temperature along the sound transmission path must be known. Measurement of rapidly changing temperature profiles within the breathing cycle is difficult, especially given the conditions of cool dry inspired gas and warm humidified exhaled gas during testing. As a result, for mainstream MM signals a fixed temperature is commonly used (measured within the USFM) and a subsequent algorithm applied to simulate estimated fluctuations occurring within-breath, based on known temperatures of inspired and expired gas and the USFM dead space volume. Accuracy of this algorithm has been optimized for infants [18], but has not been achieved to date for older subjects.

Sidestream USFM can avoid these fluctuating temperature and humidity conditions if the gas sample is first passed through nafion tubing, creating a relatively constant environment for MM measurement [17]. Additional corrections to MM change can be used if other gases are measured, such as CO<sub>2</sub> (e.g. using an infrared analyser).

Sidestream MM prototypes have been validated for SF<sub>6</sub> measurement [41], and more recently N<sub>2</sub> measurement [34]. In the latter, a further assumption is that respiratory exchange ratio (RER) remains constant through the washout: O<sub>2</sub> is calculated from measured CO<sub>2</sub>, using the constant RER, and residual change in MM is assumed to be due to change in N<sub>2</sub>. Use of a sidestream USFM (for gas concentration) in parallel to a mainstream USFM (for flow measurement) also allows detailed synchronisation of the two signals. This synchronisation may become flow-dependent if concentrations are sampled at different location to flow. The small change in MM occurring within latter breaths of the washout may be below the resolution of the MM signal. S<sub>nIII</sub> analysis has not been reported from MM based washouts.

### **E3.2 Indirect N<sub>2</sub> measurement based on simultaneous O<sub>2</sub> and CO<sub>2</sub> analysis**

It is possible to measure N<sub>2</sub> concentration indirectly by simultaneous O<sub>2</sub> and CO<sub>2</sub> measurement, based on Dalton's law of partial pressures.

$$C_{\text{alv}} = C_{\text{N}_2} + C_{\text{O}_2} + C_{\text{CO}_2} + C_{\text{H}_2\text{O}} + C_{\text{Ar}}$$

where C is the concentration of each gas, and C<sub>alv</sub> equals 1.

Concentration of argon (C<sub>Ar</sub> = 0.93%) is treated as a fixed proportion of N<sub>2</sub> concentration during washout (C<sub>Ar</sub> = C<sub>N<sub>2</sub></sub>\*0.93/78.81). Variations in temperature and humidity are minimised passing sampled gas through nafion tubing prior to arrival at the gas analysers, and applying a correction for ambient temperature and humidity, measured at the time of testing. These steps allow the equation to be simplified to:

$$C_{\text{N}_2} = 100 - C_{\text{O}_2} - C_{\text{CO}_2} - (C_{\text{N}_2} \cdot 0.93/78.81)$$

$$\text{or} \quad C_{\text{N}_2} = \frac{100 - C_{\text{O}_2} - C_{\text{CO}_2}}{(1 + (0.93/78.81))}$$

## E4. Recommendations for expirogram based indices

### E4.1 End tidal inert gas concentration

A.

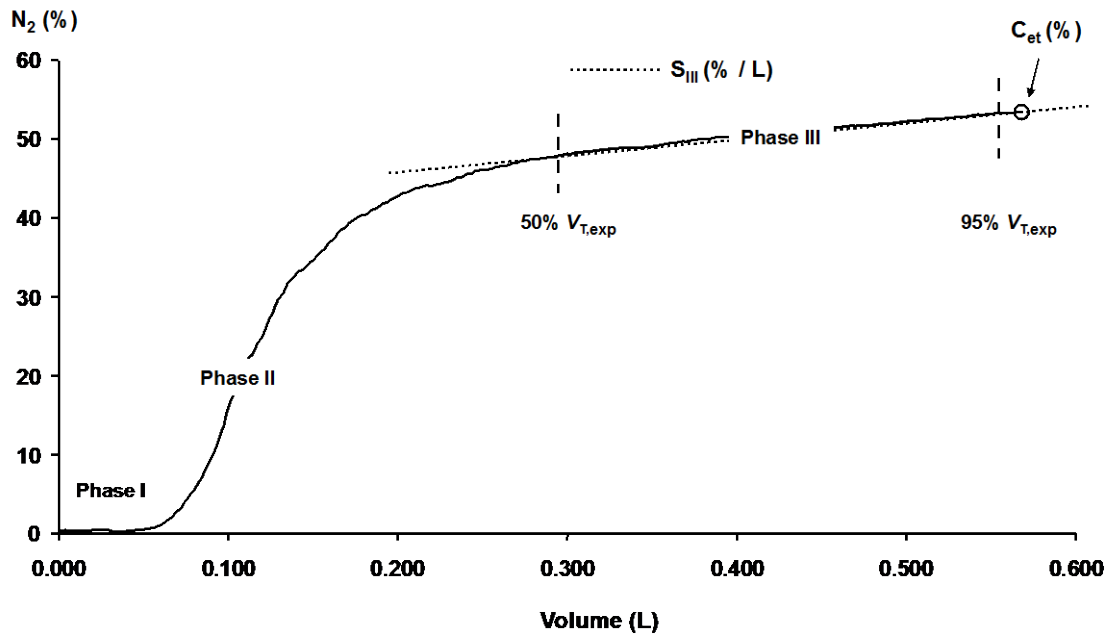

B.

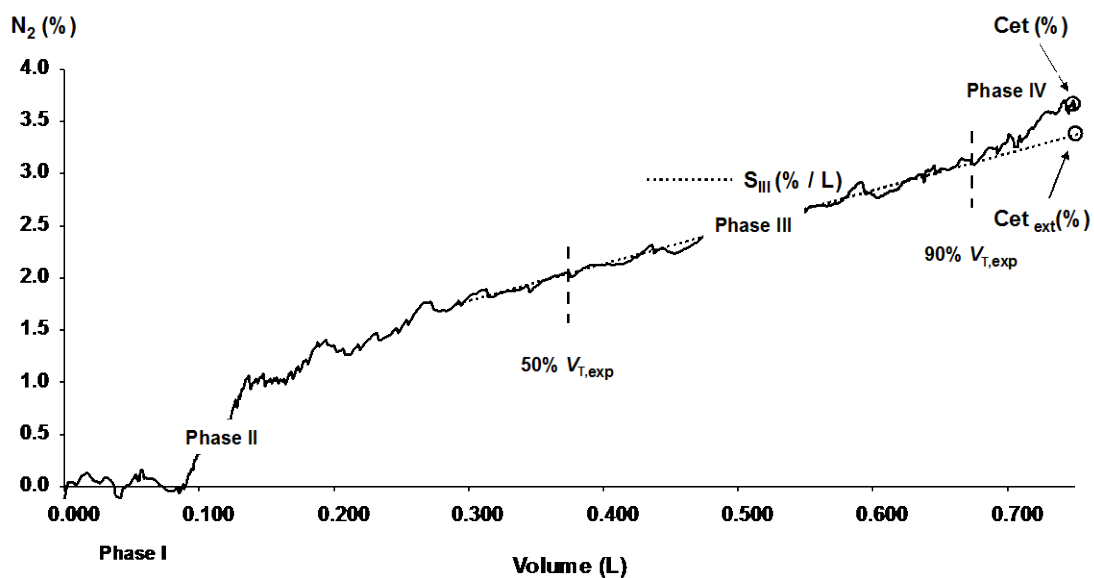

The above expirograms from early breaths (breath number one, A) and later breaths (breath number 23, B) of a  $N_2$  based MBW recording illustrate both the increasing noise at lower inert gas concentration and the potential effect of variation in  $C_{et}$  definition. Phase IV, present in this expirogram, elevates  $C_{et}$  away from the

extrapolated value from regression of the phase III slope ( $C_{et,ext}$ ). Added noise within the gas signal at the low concentrations can be smoothed by averaging over a window of a number of samples (e.g. 5-10) or time period (e.g. 25-50ms), ending approximately 5 samples (or 25ms) before the end of the breath. Alternatively the average value between 95-98% of the expired volume can be used. Note that  $S_{III}$  upper interval limit has been changed in this expirogram from 95% to 90% of  $V_T$  due to the observed phase IV interference. The low frequency noise in the later expirogram are likely to represent cardiogenic oscillations.

## E4.2 Dead space volume.

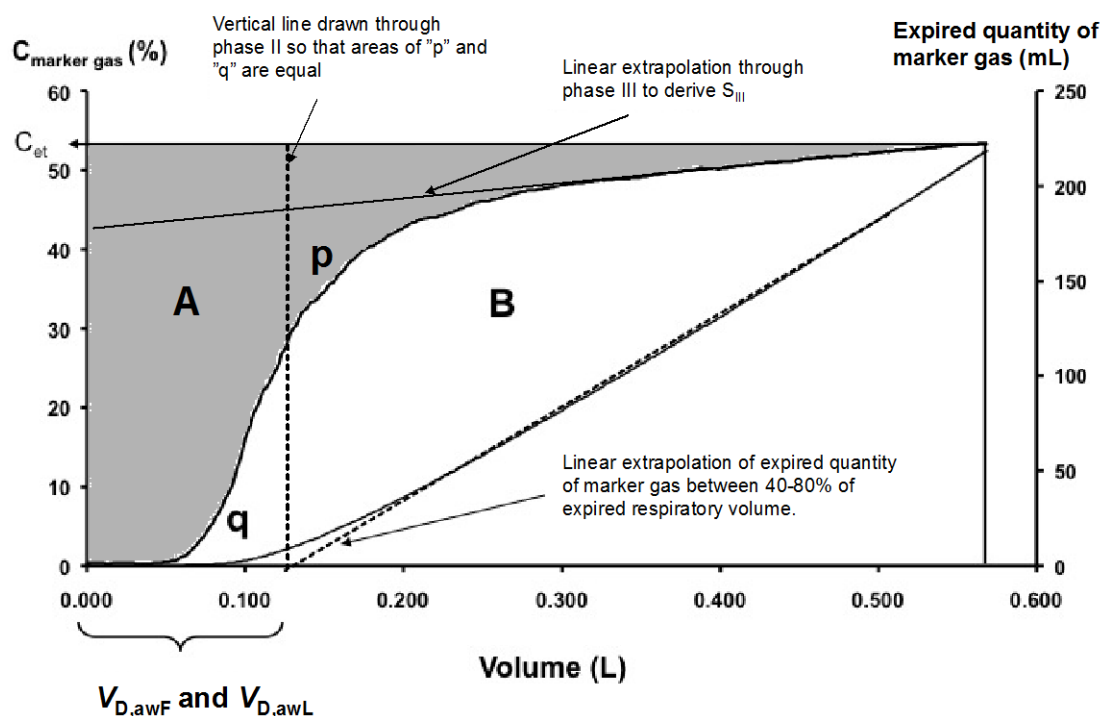

Respiratory dead space volume (Bohr deadspace,  $V_{D\text{Bohr}}$ ), expressed as a volume of exhaled marker gas, corresponds to area A (shaded area, i.e. calculated as  $C_{\text{et}} \cdot \text{expired } V_T$  minus the area under the expirogram, unshaded area or B).  $A + B = C_{\text{et}} \cdot V_T$ .  $A/(A+B)$  gives  $V_{D\text{Bohr}}/V_T$  ratio. Airways dead space volume can be calculated, as volumes of air, using either the Fowler or Langley methods ( $V_{D,\text{awF}}$  and  $V_{D,\text{awL}}$ , respectively).  $V_{D,\text{awF}}$  is calculated by calculating the regression line of  $S_{\text{III}}$ , and then positioning a vertical line through phase II, such that the areas of triangles p and q are equal.  $V_{D,\text{awF}}$  is the x-axis intercept of this vertical line [1].  $V_{D,\text{awL}}$  is calculated as the x-axis intercept of the linear regression line through the linear portion of expired marker gas volume vs. expired breath volume plot (typically 40-80% of the expired breath volume) [4, 7].

## E5. Synchronisation of flow and inert gas concentration signals.

### E5.1 Summary of currently available methods for synchronisation of inert gas and flow signals.

| <b>Synchronisation method</b>                                         | <b>Advantages</b>                                                                                                 | <b>Disadvantages</b>                                                                                                                                                                                    |
|-----------------------------------------------------------------------|-------------------------------------------------------------------------------------------------------------------|---------------------------------------------------------------------------------------------------------------------------------------------------------------------------------------------------------|
| 1. Brunner syringe method [27]                                        | Very precise.                                                                                                     | Difficult to perform prior to each test.                                                                                                                                                                |
| 2. Based on re-inspiration of expired gas from the post-gs $V_D$ [35] | Can be done prior to each test and is also feasible offline for each test. No additional equipment required.      | Depends on the quality of the breathing pattern to allow accurate identification of the start and end of breaths<br>Assumes that gas travels as a uniform front rather than in a cone (i.e. streaming). |
| 3. Alignment of mainstream and sidestream molar mass signals (USFM)   | Can be assessed breath by breath both on-line and off-line.                                                       | Patented approach<br>Limited to a particular flow sensor.                                                                                                                                               |
| 4. Automated solenoid valve controlled step response [36]             | Can be performed before each test.<br>Validated against the Brunner syringe method for inspiratory step response. | Assessment is independent of the flow sensor.                                                                                                                                                           |

**E5.2 Synchronisation of gas and flow signals using re-inspired expiratory gas from the post-gas sampling point  $V_{D}$  at the start of inspiration.**

Schematic illustration of synchronisation of inert gas signal to measured flow in a system with a  $V_D$  of 22 mL. Gas concentration and inspired volume are plotted on the left and right-sided y-axes, respectively.

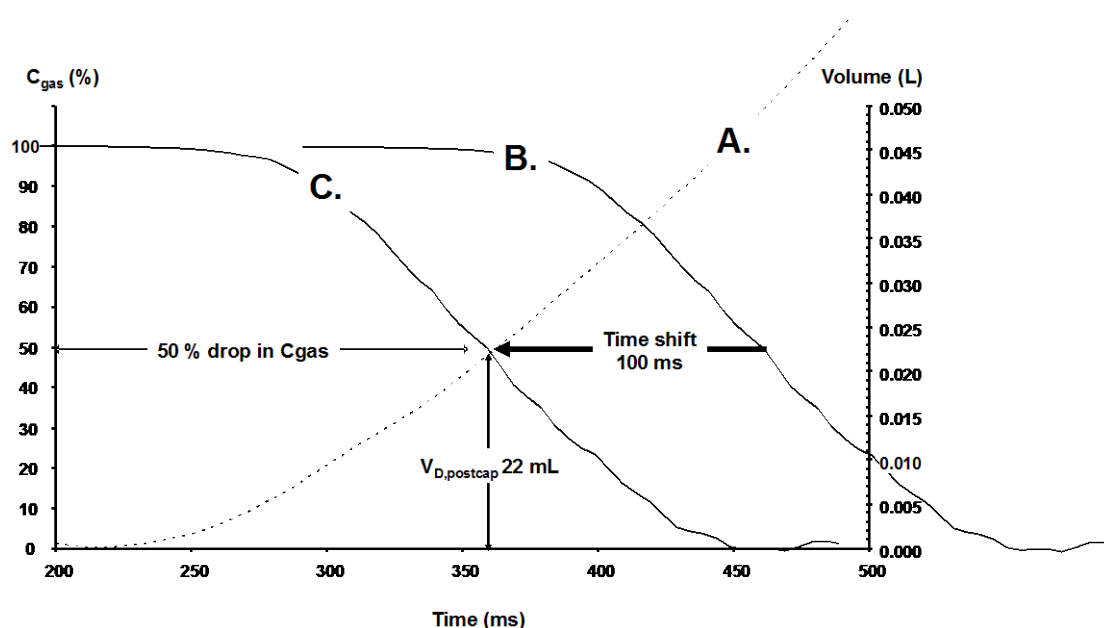

where, A is the volume trace during inspiration, B is the gas signal before synchronisation, and C is the gas signal after synchronisation. The gas signal is time shifted such that  $V_{D,post-gs}$  on the volume trace is reached at the same time as the 50% drop in inert gas concentration from starting inspiratory value. Time required for synchronisation in this washout system is 100 ms. In a modern recording system, these fittings can be done instantly by the computer over several breaths and a median value correction applied. The volume of re-inspired post-gs inert gas can be calculated by first plotting synchronised concentration of inert gas (y-axis) against inspired volume (x-axis) and then calculating the area under the curve.



## E6. MBW ventilation distribution inhomogeneity indices

### E6.1 Overview of published MBW indices

Historically the first assessments were based on a single time point, the alveolar  $N_2$  concentration after seven minutes of 100%  $O_2$  breathing [42]. Subsequently, indices based on the transition between two points on the inert gas washout curve were proposed.

|                                            |                                                                                                                                   |
|--------------------------------------------|-----------------------------------------------------------------------------------------------------------------------------------|
| <b>Nitrogen clearance index (NCI) [43]</b> | Number of lung volume turnovers (CEV/FRC) required to decrease $C_{et}$ from 90% to 10% of its concentration at start of washout. |
| <b>Lung clearance index (LCI) [44]</b>     | Number of lung volume turnovers (CEV/FRC) required to decrease $C_{et}$ to 1/40th of its concentration at start of washout.       |
| <b>Becklake Index [45]</b>                 | Number of lung volume turnovers to wash 90% of FRC free of Inert gas <i>divided by 0.9</i> .                                      |

Indices based on all points of the washout curve are less influenced by measurement error. These indices cannot differentiate between the effects of increases in  $V_D$  and gas mixing inefficiency.

|                                                                                         |                                                                                                                                                                                                                                                                                                                                                                                                                                                                                                                                                                                                        |
|-----------------------------------------------------------------------------------------|--------------------------------------------------------------------------------------------------------------------------------------------------------------------------------------------------------------------------------------------------------------------------------------------------------------------------------------------------------------------------------------------------------------------------------------------------------------------------------------------------------------------------------------------------------------------------------------------------------|
| <b>Mean dilution number (MDN<sub>1</sub> and MDN<sub>2</sub>) [46] or Moment ratios</b> | <p>Mean number of TO that a gas molecule remains in lung.</p> <p>Independent of changes in breathing pattern, except when <math>V_D</math> is significantly <math>&gt; 0</math> and when <math>V_T/FRC</math> decreases toward the end of the washout [47, 48] as occurs in infants during MBNW [49]</p> <p>Often referred to as moment ratios. <math>M_1/M_0</math> (MDN<sub>1</sub>), ratio between 1<sup>st</sup> and 0<sup>th</sup> moments of washout curve. <math>M_2/M_0</math> (MDN<sub>2</sub>), ratio between 2<sup>nd</sup> and 0<sup>th</sup> moments of washout curve (section E6.4).</p> |
| <b>Pulmonary clearance delay (PCD, %) [50]</b>                                          | <p>Compares mean clearance time for gas molecule with ideal clearance value.</p> <p>Defined as <math>100 \cdot (\text{actual average time a tracer gas molecule remains in the lungs} - \text{the ideal time})/\text{the ideal time}</math>.</p>                                                                                                                                                                                                                                                                                                                                                       |
| <b>PCD for moment ratio (%) [51]</b>                                                    | Defined as $100 \cdot (\text{actual moment ratio} - \text{ideal moment ratio})/\text{ideal moment ratio}$ .                                                                                                                                                                                                                                                                                                                                                                                                                                                                                            |

|                                                  |                                                                                                                                                                                                                                                                                                                                                                                                                                                                                                                                                                                                                                                                               |
|--------------------------------------------------|-------------------------------------------------------------------------------------------------------------------------------------------------------------------------------------------------------------------------------------------------------------------------------------------------------------------------------------------------------------------------------------------------------------------------------------------------------------------------------------------------------------------------------------------------------------------------------------------------------------------------------------------------------------------------------|
| <b>Curvilinearity [52] or “Slope Index” [14]</b> | <p>Based on the objective measurement of the degree to which the lung acts as separate compartments with differing time constants when emptying [53, 54].</p> <p>Log values of <math>C_{et}</math> for each breath of the MBW are plotted against TO. Two compartments are defined by the slopes between the two compartments: either by TO value (e.g. TO 3-6, <math>RS_2</math>, and TO 0-3, <math>RS_1</math> [52]) or by percentage of the TO value (10-50% TO, A, and 50-100% TO, B [14]).</p> <p>Then expressed as the ratio of distal potentially slower emptying compartment to the more proximal faster emptying compartment i.e. B/A or <math>RS_2/RS_1</math>.</p> |
| <b>Efficiency (%) (Eff) [55]</b>                 | <p>Ideal <i>versus</i> actual number of TO to reduce end-tidal inert gas concentration to 1% of original concentration (i.e. perfect mixing lung <i>versus</i> subject lung). Decreases as ventilation inhomogeneity increases.</p>                                                                                                                                                                                                                                                                                                                                                                                                                                           |

Indices have been developed, based on alveolar ventilation, which are proposed to be independent of changes in dead space volume and breathing pattern.

|                                                                                   |                                                                                                                                                                                                                                                                                                                                                                                                                                                                                                                                                                                                         |
|-----------------------------------------------------------------------------------|---------------------------------------------------------------------------------------------------------------------------------------------------------------------------------------------------------------------------------------------------------------------------------------------------------------------------------------------------------------------------------------------------------------------------------------------------------------------------------------------------------------------------------------------------------------------------------------------------------|
| <b>Mixing ratio (MR) [47]</b>                                                     | <p>Ratio between observed and ideal number of breaths required to decrease <math>C_{et}</math> to <math>1/40^{th}</math> of its concentration at start of washout.</p> <p>The ideal number of breaths should be calculated from the ratio between the logarithm for the <math>C_{et}</math> at end-washout and the logarithm for the FRC-to-(FRC + alveolar <math>V_T</math>) ratio. Alveolar <math>V_T</math> is calculated from average <math>V_T</math> during the MBW minus the predicted airway dead space (i.e. body wt (kg) x 2, mL) [56]. Ideal single uniformly ventilated space = MR of 1</p> |
| <b>Alveolar mean dilution number (AMDN<sub>1</sub> and AMDN<sub>2</sub>) [48]</b> | <p>Similar to mean dilution number (moment ratios). However, TO refer to alveolar volume rather than FRC. Alternatively referred to as alveolar moment ratio.</p>                                                                                                                                                                                                                                                                                                                                                                                                                                       |
| <b>Alveolar lung clearance index (ALCI)</b>                                       | <p>Number of alveolar TO (<math>CEV_{alv}/FRC</math>) required to decrease <math>C_{et}</math> to <math>1/40^{th}</math> of its concentration at start of washout.</p>                                                                                                                                                                                                                                                                                                                                                                                                                                  |
| <b>Inspired gas distribution index (IDI) [57]</b>                                 | <p>Ratio of theoretical and actual cumulative alveolar ventilation required to reduce alveolar inert gas concentration of FRC to given level. In ideal, single, uniformly ventilated space, ratio would be 1.0. Conceptually similar to mixing ratio.</p>                                                                                                                                                                                                                                                                                                                                               |
| <b>Multiple-breath alveolar mixing inefficiency % (MBAMI) [58]</b>                | <p>Defined as <math>100 \cdot (1 - TO_{ideal}/TO_{actual})</math><br/> Where, <math>TO_{ideal}</math> is number of TO needed to wash 90% of FRC free of inert gas, and <math>TO_{actual}</math> is actual number of TO. TO is corrected for <math>V_D</math> (hence “alveolar”)</p>                                                                                                                                                                                                                                                                                                                     |

Slope based indices measured during MBW.

|                                                           |                                                                                                                                                                                                                                                                                                                                                                                                                                                                                                                                                                                                                                                                                                                                                                                                                                                                                                  |
|-----------------------------------------------------------|--------------------------------------------------------------------------------------------------------------------------------------------------------------------------------------------------------------------------------------------------------------------------------------------------------------------------------------------------------------------------------------------------------------------------------------------------------------------------------------------------------------------------------------------------------------------------------------------------------------------------------------------------------------------------------------------------------------------------------------------------------------------------------------------------------------------------------------------------------------------------------------------------|
| <p><b>Normalised phase III slope progression [59]</b></p> | <p>Progression of, or increase in, the <math>S_{III}</math>, normalised for gas dilution (<math>S_{nIII}</math>), through the breaths of the MBW. Provides information about relative contributions of the two main gas transport mechanisms within the lung, convection and molecular diffusion. Inhomogeneity of ventilation distribution can be partitioned into that arising from within the conducting airways, termed convection-dependent inhomogeneity (CDI), and that arising in the region of the entrance to the acinus, due to the interaction between convection and diffusion, termed convection-diffusion-dependent inhomogeneity (DCDI). These can be expressed as clinical indices, <math>S_{cond}</math> and <math>S_{acin}</math>, respectively [38]. The full DCDI contribution is equivalent to the y-axis intercept of the <math>S_{cond}</math> regression line [60].</p> |
|-----------------------------------------------------------|--------------------------------------------------------------------------------------------------------------------------------------------------------------------------------------------------------------------------------------------------------------------------------------------------------------------------------------------------------------------------------------------------------------------------------------------------------------------------------------------------------------------------------------------------------------------------------------------------------------------------------------------------------------------------------------------------------------------------------------------------------------------------------------------------------------------------------------------------------------------------------------------------|

**E6.2 FRC value used for calculation of ventilation distribution inhomogeneity indices.**

FRC values chosen should correspond to ventilation inhomogeneity indices in two different ways: with respect to the geometric point of measurement in the airstream and with respect to time elapsed during the washout (i.e. the end-test threshold used for ventilation inhomogeneity index, e.g. LCI), as outlined in the main document. The geometric aspect is summarised in the table below. The CEV and FRC used for TO calculation must also be consistent.

| <p><b>Geometric point of reference for Ventilation Inhomogeneity assessment</b></p> | <p><b>Corresponding FRC used</b></p>                                                               | <p><b>Correction of <math>V_T</math> required and <math>V_T</math> nomenclature</b></p>                                            |
|-------------------------------------------------------------------------------------|----------------------------------------------------------------------------------------------------|------------------------------------------------------------------------------------------------------------------------------------|
| <p>1. Distal to post-gs dead space volume (<math>V_{D, post-gs}</math>)</p>         | <p><math>FRC_{gs}</math> plus <math>V_{D, post-gs}</math></p>                                      | <p>No correction required; full <math>V_T</math></p>                                                                               |
| <p>2. At the gas sampling point (gs)</p>                                            | <p><math>FRC_{gs}</math></p>                                                                       | <p><math>V_T</math> minus <math>V_{D, post-gs}</math>, designated as <math>V_{T,gs}</math></p>                                     |
| <p>3. At the airway opening (i.e. lips)</p>                                         | <p><math>FRC_{gs}</math> minus <math>V_{D, pre-gs}</math>. Designated as <math>FRC_{ao}</math></p> | <p><math>V_T</math> minus both <math>V_{D, pre-gs}</math> and <math>V_{D, post-gs}</math>. Designated as <math>V_{T,ao}</math></p> |



### E6.3 Calculation of trapped gas volume ( $V_{TG}$ )

Trapped gas volume ( $V_{TG}$ ) can be calculated by performing five inspiratory capacity breaths at the end of the MBW. MBNW  $V_{TG}$  is based on two assumptions: trapped gas has the same  $N_2$  concentration as air, and that equilibration of  $N_2$  concentration between the region of trapped gas and the remainder of the lung occurs after five IC breaths.

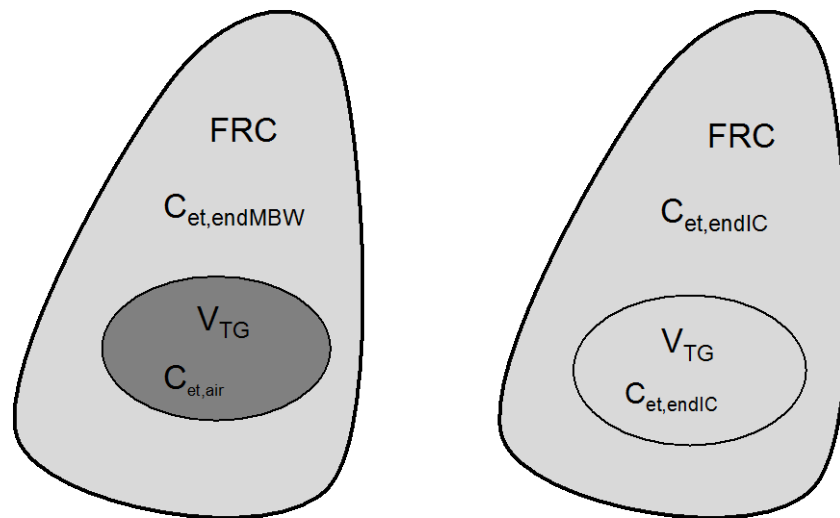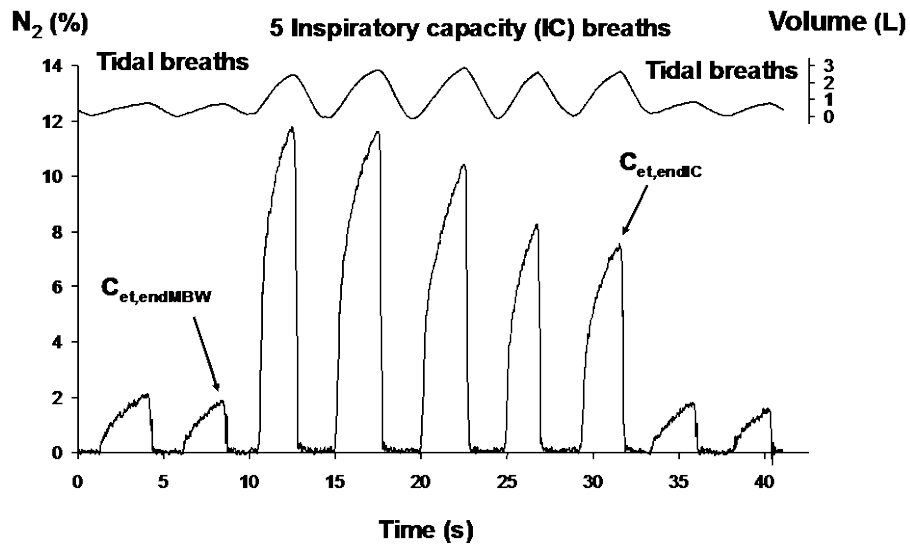

Where,

$C_{et,endMBW}$  = end-tidal concentration of  $N_2$  at end of MBW, approximately 2.0%

$C_{et,air}$  = end-tidal concentration of  $N_2$  during air breathing before start of MBW

$C_{\text{et,endIC}}$  = end-tidal concentration  $N_2$  at last breath of the 5 IC breaths, assumed to be same in FRC and  $V_{\text{TG}}$

$\text{Vol}N_{2, \text{IC}5}$  = the volume of  $N_2$  expired over the 5 IC breaths

Mass balance gives:

$$\text{FRC} \cdot C_{\text{et,endMBW}} + V_{\text{TG}} \cdot C_{\text{et,air}} = \text{FRC} \cdot C_{\text{et,endIC}} + V_{\text{TG}} \cdot C_{\text{et,eIC}} + \text{Vol}N_{2, \text{IC}5}$$

Rearranging gives:

$$V_{\text{TG}} \cdot C_{\text{et,air}} - V_{\text{TG}} \cdot C_{\text{et,endIC}} = \text{FRC} \cdot C_{\text{et,endIC}} - \text{FRC} \cdot C_{\text{et,endMBW}} + \text{Vol}N_{2, \text{IC}5}$$

Rearranging gives: 
$$V_{\text{TG}} = \frac{\text{Vol}N_{2, \text{IC}5} + \text{FRC} \cdot (C_{\text{et,endIC}} - C_{\text{et,endMBW}})}{C_{\text{et,air}} - C_{\text{et,endIC}}}$$

## E6.4 Calculation of moment ratios

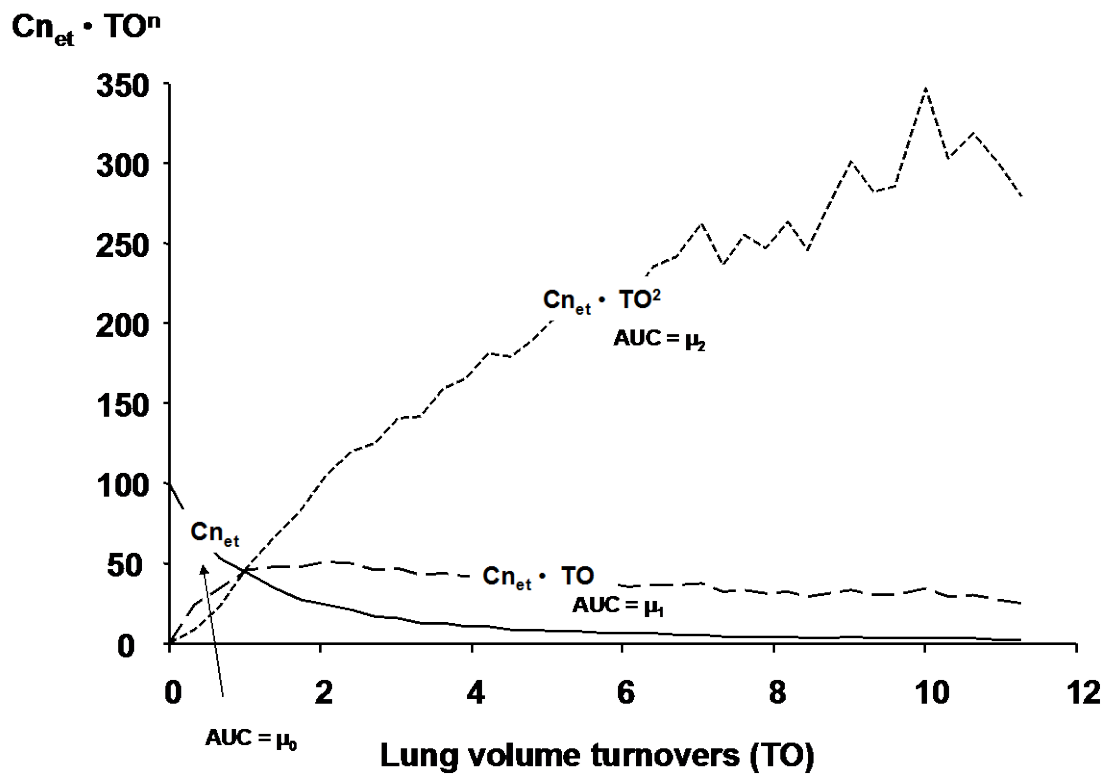

Moment analysis from a N<sub>2</sub> MBW of a 15 year old girl with CF. Initially, concentration normalised end-tidal concentration of inert marker gas (C<sub>n<sub>et</sub></sub>) is plotted against TO. Moments 0, 1, and 2 (μ<sub>0</sub>, μ<sub>1</sub>, and μ<sub>2</sub>) are determined by calculating the area under the curves for C<sub>n<sub>et</sub></sub>, C<sub>n<sub>et</sub></sub> • TO, and C<sub>n<sub>et</sub></sub> • TO<sup>2</sup>, plotted against TO (x-axis), respectively. These are then expressed as moment ratios μ<sub>1</sub>/μ<sub>0</sub> and μ<sub>2</sub>/μ<sub>0</sub>. The values obtained for this MBW are shown below, along with the values if truncation at either 6 or 8 TO is applied. Truncation is recommended to facilitate comparison between subjects [46].

|                   | μ <sub>0</sub> | μ <sub>1</sub> | μ <sub>2</sub> | μ <sub>1</sub> /μ <sub>0</sub> | μ <sub>2</sub> /μ <sub>0</sub> |
|-------------------|----------------|----------------|----------------|--------------------------------|--------------------------------|
| Raw data          | 170            | 459            | 2625           | 2.70                           | 15.44                          |
| Truncated to 6 TO | 141            | 254            | 797            | 1.80                           | 5.65                           |
| Truncated to 8 TO | 156            | 326            | 1302           | 2.09                           | 8.35                           |

### E6.5 Correction of $S_{n_{III}}$ analysis for variations in lung size and breathing pattern

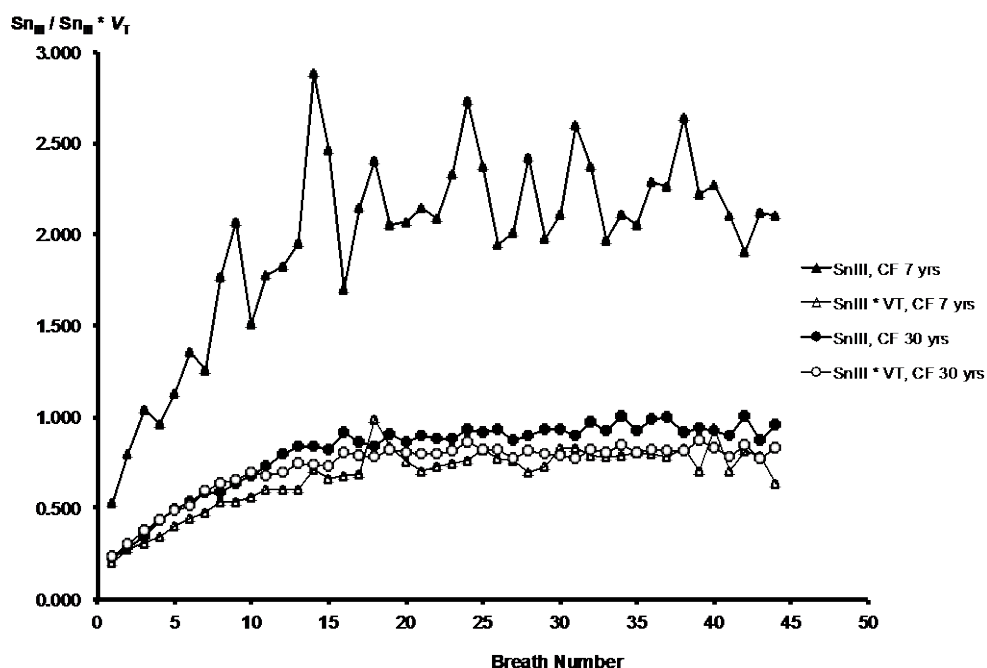

$S_{n_{III}}$  progression over a MBW test from two different CF subjects. Breath number is used along the x-axis to allow a better visual comprehension of individual breath comparison, but should be plotted against TO for formal calculations. The adult subject breathes at  $V_T$  close to 1L and therefore the effect of  $V_T$  correction of  $S_{n_{III}}$  does not lead to a large change compared to uncorrected values. However, in the paediatric subject, there is a pronounced effect of  $V_T$  correction compared the uncorrected  $S_{n_{III}}$  values.



**E6.6 Effect of choice of normalisation concentration on  $S_{n_{III}}$  progression through the MBW.**

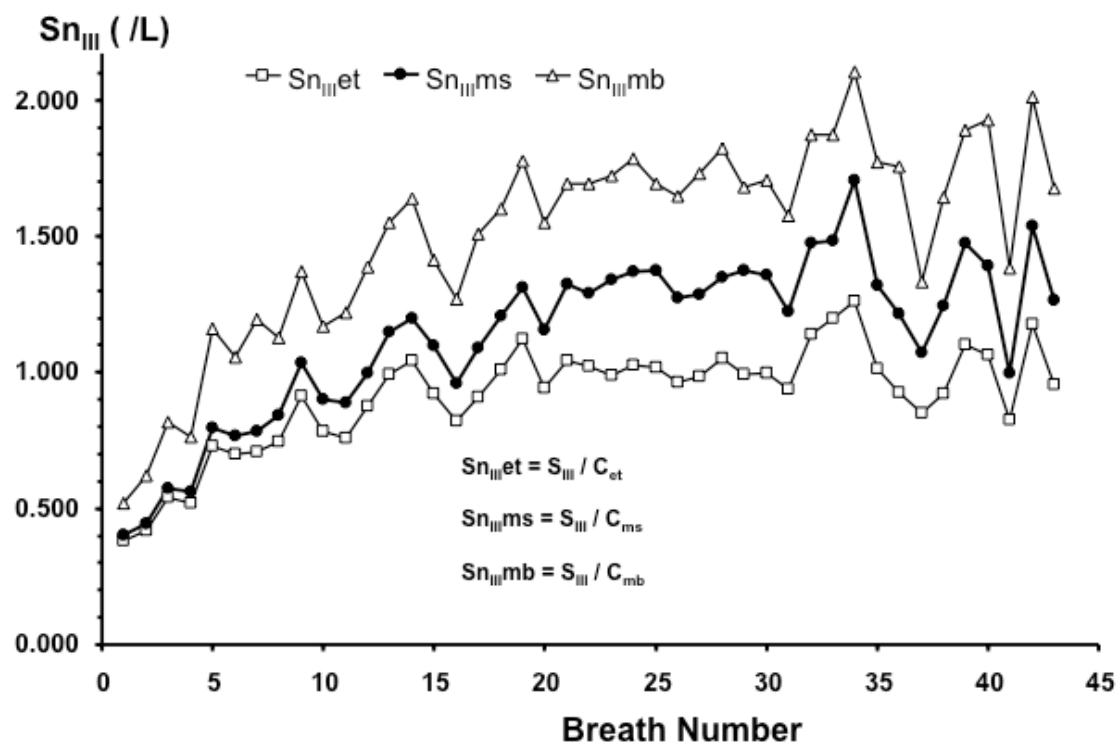

Both  $S_{cond}$  and  $S_{acin}$  are affected by the choice of reference gas concentration for  $S_{III}$  normalisation, and the reference concentration does differ currently in paediatric and adult literature [38, 61]. There are three different options for reference gas concentration when normalising phase III slope ( $S_{III}$ ) to calculate  $S_{n_{III}}$  for each breath: the end tidal concentration ( $C_{et}$ ), the mean concentration over the slope interval ( $C_{ms}$ ), or the mean expired gas concentration ( $C_{mb}$ ). However, these are not necessarily equivalent as they change in proportion to each other during the washout, affecting the absolute values and resultant progression of the  $S_{n_{III}}$  during the MBW [62]. Formal comparisons of the sensitivity and specificity of  $S_{n_{III}}$  indices calculated with each of these options are required before strict recommendations can be given. In the interim, authors should fully describe which reference gas concentration is used.

## E7. References

1. Fowler WS. Lung function studies; the respiratory dead space. *Am J Physiol* 1948; 154(3): 405-416.
2. Saatci E, Miller DM, Stell IM, Lee KC, Moxham J. Dynamic dead space in face masks used with noninvasive ventilators: a lung model study. *The European respiratory journal : official journal of the European Society for Clinical Respiratory Physiology* 2004; 23(1): 129-135.
3. Thamrin C, Latzin P, Sauteur L, Riedel T, Hall GL, Frey U. Dead-space estimation from CO<sub>2</sub> versus molar mass measurements in infants. *Pediatr Pulmonol* 2007; 42(10): 920-927.
4. Tang Y, Turner MJ, Baker AB. Effects of lung time constant, gas analyser delay and rise time on measurements of respiratory dead-space. *Physiol Meas* 2005; 26(6): 1103-1114.
5. Zuntz N. Physiologie der Blutgase und des respiratorischen Gaswechsels. In: . In: HERMANN L, ed. *Handbuch der Physiologie* Leipzig: Vogel., 1882.
6. Bohr C. Ueber die lungenathmung. *Skand Arch Physiol* 1891; 2: 236-268.
7. Langley F, Even P, Duroux P, Nicolas RL, Cumming G. Ventilatory consequences of unilateral pulmonary artery occlusion. *Les Colloques des l'Institut National de la Sante' et de la Recherche Me'dicale* 1975; 51: 209-212.
8. Bates JH, Schmalisch G, Filbrun D, Stocks J. Tidal breath analysis for infant pulmonary function testing. ERS/ATS Task Force on Standards for Infant Respiratory Function Testing. European Respiratory Society/American Thoracic Society. *Eur Respir J* 2000; 16(6): 1180-1192.
9. Frey U, Stocks J, Coates A, Sly P, Bates J. Specifications for equipment used for infant pulmonary function testing. ERS/ATS Task Force on Standards for Infant Respiratory Function Testing. European Respiratory Society/ American Thoracic Society. *Eur Respir J* 2000; 16(4): 731-740.
10. Yeh MP, Gardner RM, Adams TD, Yanowitz FG. Computerized determination of pneumotachometer characteristics using a calibrated syringe. *Journal of applied physiology: respiratory, environmental and exercise physiology* 1982; 53(1): 280-285.
11. ATS/ERS statement: raised volume forced expirations in infants: guidelines for current practice. *American journal of respiratory and critical care medicine* 2005; 172(11): 1463-1471.
12. Turner MJ, MacLeod IM, Rothberg AD. Effects of temperature and composition on the viscosity of respiratory gases. *J Appl Physiol* 1989; 67(1): 472-477.
13. Quanjer PH, Tammeling GJ, Cotes JE, Pedersen OF, Peslin R, Yernault JC. Lung volumes and forced ventilatory flows. Appendix: factors affecting measurements of gas flow by pneumotachometer. *The European respiratory journal Supplement* 1993; 16: 30-32.
14. Prisk GK, Guy HJ, Elliott AR, Paiva M, West JB. Ventilatory inhomogeneity determined from multiple-breath washouts during sustained microgravity on Spacelab SLS-1. *J Appl Physiol* 1995; 78(2): 597-607.
15. Guy HJ, Prisk GK, West JB. Pulmonary function in microgravity: Spacelab 4 and beyond. *Acta Astronaut* 1988; 17(10): 1139-1143.

16. Schena J, Thompson J, Crone RK. Mechanical influences on the capnogram. *Critical care medicine* 1984; 12(8): 672-674.
17. Mauritz KA, Moore RB. State of understanding of nafion. *Chem Rev* 2004; 104(10): 4535-4585.
18. Latzin P, Sauteur L, Thamrin C, Schibler A, Baldwin D, Hutten GJ, Kyburz M, Kraemer R, Riedel T, Frey U. Optimized temperature and deadspace correction improve analysis of multiple breath washout measurements by ultrasonic flowmeter in infants. *Pediatr Pulmonol* 2007; 42(10): 888-897.
19. Robinson PD, Turner M, King GG, Ström M, Gustafsson PM. The effect of humidity on the performance of respiratory nitrogen analysers. *Eur Respir J* 2010; 36(Suppl. 54): 843s.
20. Ferrus L, Guenard H, Vardon G, Varene P. Respiratory water loss. *Respir Physiol* 1980; 39(3): 367-381.
21. Gustafsson PM, Johansson HJ, Dahlback GO. Pneumotachographic nitrogen washout method for measurement of the volume of trapped gas in the lungs. *Pediatr Pulmonol* 1994; 17(4): 258-268.
22. Brunner JX, Westenskow DR. How the rise time of carbon dioxide analysers influences the accuracy of carbon dioxide measurements. *Br J Anaesth* 1988; 61(5): 628-638.
23. Macleod KA, Horsley AR, Latzin P, Bell NJ, Innes JA, Cunningham S. Modifications to a photoacoustic gas analyser increases accuracy of functional residual capacity measurements by multiple breath washout of SF6 in an infant lung model. *Eur Respir J* 2008; 32(Supplement 52): 691s.
24. Farmery AD, Hahn CE. Response-time enhancement of a clinical gas analyzer facilitates measurement of breath-by-breath gas exchange. *Journal of applied physiology* 2000; 89(2): 581-589.
25. Arieli R, Van Liew HD. Corrections for the response time and delay of mass spectrometers. *J Appl Physiol* 1981; 51(6): 1417-1422.
26. Horsley AR, Gustafsson PM, Macleod KA, Saunders C, Greening AP, Porteous DJ, Davies JC, Cunningham S, Alton EW, Innes JA. Lung clearance index is a sensitive, repeatable and practical measure of airways disease in adults with cystic fibrosis. *Thorax* 2008; 63(2): 135-140.
27. Brunner JX, Wolff G, Cumming G, Langenstein H. Accurate measurement of N2 volumes during N2 washout requires dynamic adjustment of delay time. *J Appl Physiol* 1985; 59(3): 1008-1012.
28. Wrigge H, Sydow M, Zinserling J, Neumann P, Hinz J, Burchardi H. Determination of functional residual capacity (FRC) by multibreath nitrogen washout in a lung model and in mechanically ventilated patients. Accuracy depends on continuous dynamic compensation for changes of gas sampling delay time. *Intensive Care Med* 1998; 24(5): 487-493.
29. Beydon N, Davis SD, Lombardi E, Allen JL, Arets HG, Aurora P, Bisgaard H, Davis GM, Ducharme FM, Eigen H, Gappa M, Gaultier C, Gustafsson PM, Hall GL, Hantos Z, Healy MJ, Jones MH, Klug B, Lodrup Carlsen KC, McKenzie SA, Marchal F, Mayer OH, Merkus PJ, Morris MG, Oostveen E, Pillow JJ, Seddon PC, Silverman M, Sly PD, Stocks J, Tepper RS, Vilozni D, Wilson NM. An official American Thoracic Society/European Respiratory Society statement: pulmonary function testing in preschool children. *Am J Respir Crit Care Med* 2007; 175(12): 1304-1345.
30. Marsh MJ, Ingram D, Milner AD. The effect of instrumental dead space on measurement of breathing pattern and pulmonary mechanics in the newborn. *Pediatric pulmonology* 1993; 16(5): 316-322.

31. Schmalisch G, Foitzik B, Wauer RR, Stocks J. Effect of apparatus dead space on breathing parameters in newborns: "flow-through" versus conventional techniques. *The European respiratory journal : official journal of the European Society for Clinical Respiratory Physiology* 2001; 17(1): 108-114.
32. Schulzke SM, Deeptha K, Sinhal S, Baldwin DN, Pillow JJ. Nasal versus face mask for multiple-breath washout technique in preterm infants. *Pediatr Pulmonol* 2008; 43(9): 858-865.
33. Fuchs SI, Gappa M, Waltner-Romen M, Ellemunter H. Hygienic safety of an ultrasonic flow sensor for multiple breath washout. *Pediatr Pulmonol* 2009; 44(1): 99-100.
34. Fuchs SI, Buess C, Gappa M. In vitro validation of nitrogen multiple breath washout using ultrasonic equipment. *Eur Respir J* 2011; 38(Suppl 55).
35. Singer F, Houltz B, Latzin P, Robinson PD, Gustafsson PM. A realistic validation study of a new nitrogen multiple-breath washout system. *PLoS ONE* 2012; 7(4): e36083.
36. Gustafsson PM, Aurora P, Lindblad A. Evaluation of ventilation maldistribution as an early indicator of lung disease in children with cystic fibrosis. *Eur Respir J* 2003; 22(6): 972-979.
37. Downie SR, Salome CM, Verbanck S, Thompson B, Berend N, King GG. Ventilation heterogeneity is a major determinant of airway hyperresponsiveness in asthma, independent of airway inflammation. *Thorax* 2007; 62(8): 684-689.
38. Verbanck S, Schuermans D, Van Muylem A, Paiva M, Noppen M, Vincken W. Ventilation distribution during histamine provocation. *J Appl Physiol* 1997; 83(6): 1907-1916.
39. Schibler A, Henning R. Measurement of functional residual capacity in rabbits and children using an ultrasonic flow meter. *Pediatr Res* 2001; 49(4): 581-588.
40. Buess C, Pietsch P, Guggenbuhl W, Koller EA. A pulsed diagonal-beam ultrasonic airflow meter. *Journal of applied physiology* 1986; 61(3): 1195-1199.
41. Fuchs SI, Sturz J, Junge S, Ballmann M, Gappa M. A novel sidestream ultrasonic flow sensor for multiple breath washout in children. *Pediatr Pulmonol* 2008; 43(8): 731-738.
42. Cournand A, Baldwin ED, Darling RC, Richards DW. Studies on Intrapulmonary Mixture of Gases. Iv. The Significance of the Pulmonary Emptying Rate and a Simplified Open Circuit Measurement of Residual Air. *The Journal of clinical investigation* 1941; 20(6): 681-689.
43. Sandberg K, Edberg KE, Benton W, Silberberg A, Sladek M, Sundell HW. Surfactant improves gas mixing and alveolar ventilation in preterm lambs. *Pediatr Res* 1991; 30(2): 181-189.
44. Bouhuys A, Lichtneckert S, Lundgren C, Lundin G. Voluntary changes in breathing pattern and N<sub>2</sub> clearance from lungs. *J Appl Physiol* 1961; 16: 1039-1042.
45. Becklake MR. A new index of the intrapulmonary mixture of inspired air. *Thorax* 1952; 7(1): 111-116.
46. Saidel GM, Salmon RB, Chester EH. Moment analysis of multibreath lung washout. *J Appl Physiol* 1975; 38(2): 328-334.
47. Edelman NH, Mittman C, Norris AH, Shock NW. Effects of respiratory pattern on age differences in ventilation uniformity. *J Appl Physiol* 1968; 24(1): 49-53.
48. Habib RH, Lutchen KR. Moment analysis of a multibreath nitrogen washout based on an alveolar gas dilution number. *Am Rev Respir Dis* 1991; 144(3 Pt 1): 513-519.

49. Schibler A, Schneider M, Frey U, Kraemer R. Moment ratio analysis of multiple breath nitrogen washout in infants with lung disease. *Eur Respir J* 2000; 15(6): 1094-1101.
50. Fowler WS, Cornish ER, Jr., Kety SS. Lung function studies. viii. Analysis of alveolar ventilation by pulmonary N<sub>2</sub> clearance curves. *J Clin Invest* 1952; 31(1): 40-50.
51. Larsson A, Jonmarker C, Werner O. Ventilation inhomogeneity during controlled ventilation. Which index should be used? *J Appl Physiol* 1988; 65(5): 2030-2039.
52. Rodriguez-Nieto MJ, Peces-Barba G, Gonzalez Mangado N, Paiva M, Verbanck S. Similar ventilation distribution in normal subjects prone and supine during tidal breathing. *J Appl Physiol* 2002; 92(2): 622-626.
53. Robertson JS, Siri WE, Jones HB. Lung ventilation patterns determined by analysis of nitrogen elimination rates; use of mass spectrometer as a continuous gas analyzer. *J Clin Invest* 1950; 29(5): 577-590.
54. Briscoe WA, Cournand A. Uneven ventilation of normal and diseased lungs studied by an open-circuit method. *J Appl Physiol* 1959; 14(3): 284-290.
55. Bolton DP. Diffusional inhomogeneity: gas mixing efficiency in the new-born lung. *J Physiol* 1979; 286: 447-455.
56. Gronkvist M, Bergsten E, Gustafsson PM. Effects of body posture and tidal volume on inter- and intraregional ventilation distribution in healthy men. *J Appl Physiol* 2002; 92(2): 634-642.
57. Hanson JS, Shinozaki T. Hybrid computer studies of ventilatory distribution and lung volume. I. Normal newborn infants. *Pediatrics* 1970; 46(6): 900-914.
58. Cumming G, Guyatt AR. Alveolar gas mixing efficiency in the human lung. *Clin Sci (Lond)* 1982; 62(5): 541-547.
59. Crawford AB, Makowska M, Paiva M, Engel LA. Convection- and diffusion-dependent ventilation maldistribution in normal subjects. *J Appl Physiol* 1985; 59(3): 838-846.
60. Robinson PD, Wernstedt P, Brune M, Gustafsson PM. SDCDI, an Additional Index to Sacin To Assess Diffusion-Convection Dependent Inhomogeneity in Multiple Breath Inert Gas Washout Analysis. *Am J Respir Crit Care Med* 2009; 179(1): A2090.
61. Gustafsson PM. Pulmonary gas trapping increases in asthmatic children and adolescents in the supine position. *Pediatr Pulmonol* 2003; 36(1): 34-42.
62. Robinson PD, Kjellberg S, Gronkvist M, Bergsten E, Gustafsson P. Phase III Slope Calculation from Alveolar Deadspace in Multiple Breath Washout. *Eur Respir J* 2010; 36(Suppl. 54): 178s.
